# Supplementary material for: Untangling Dual-Targeting Therapeutic Mechanism of Epidermal Growth Factor Receptor (EGFR) Based on Reversed Allosteric Communication
Source: MDPI journal article supplement (doi:10.3390/pharmaceutics13050747), 2021-05-18
Supplement: s1 [file s1]

# Supplementary Materials: Untangling Dual-Targeting Therapeutic Mechanism based on Reverse Allosteric Communication

Yuran Qiu, Xiao-Lan Yin, Xinyi Li, Yuanhao Wang, Qiang Fu, Renhua Huang and Shaoyong Lu

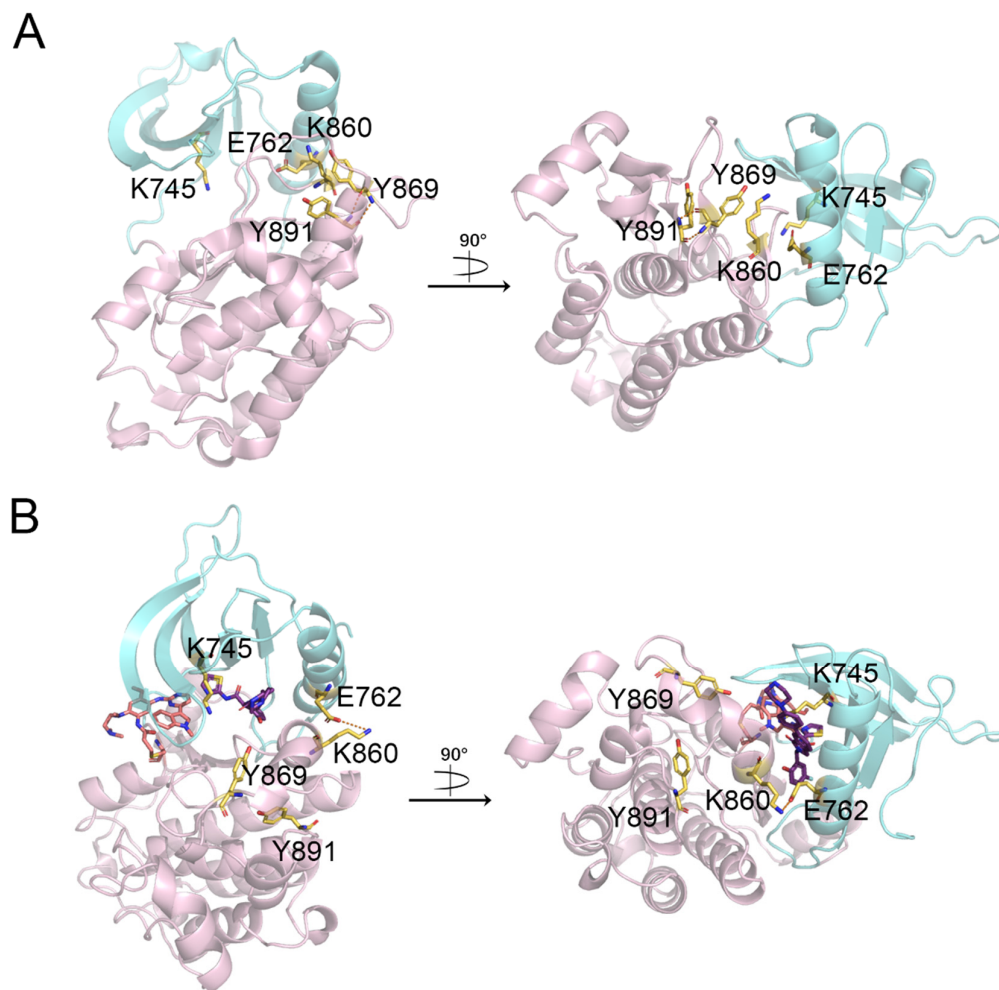

**Figure S1.** Starting structures of the EGFR<sup>L858R/T790M</sup> (**A**) and EGFR<sup>L858R/T790M</sup>-osimertinib-JBJ-04-125-02 (**B**) systems. N-lobe and C-lobe are colored in cyan and pink, respectively. Key residues are depicted by yellow sticks and the salt bridges are depicted by orange dashed lines.

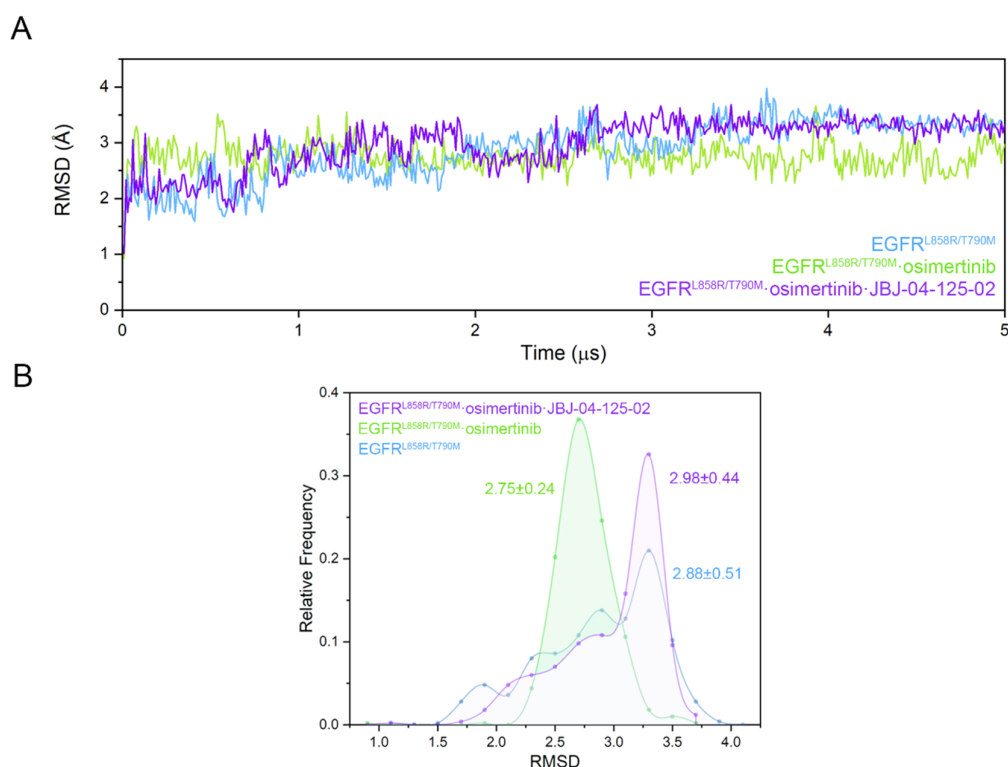

**Figure S2.** Root-mean-square deviations (RMSD) of C $\alpha$  atoms in the EGFR<sup>L858R/T790M</sup> (blue), EGFR<sup>L858R/T790M</sup>–osimertinib (green), and EGFR<sup>L858R/T790M</sup>–osimertinib–BJJ-04-125-02 systems (purple) depicted in the curve chart (A) and the frequency distribution graph (B).

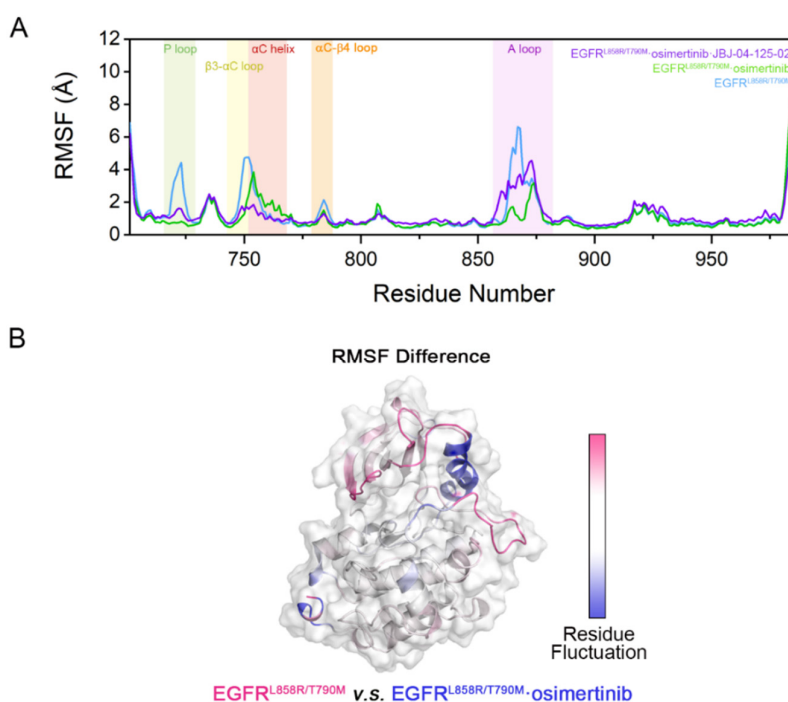

**Figure S3.** (A) Root-mean-square fluctuations (RMSF) of C $\alpha$  atoms in the EGFR<sup>L858R/T790M</sup> (blue), EGFR<sup>L858R/T790M</sup>–osimertinib (green), and EGFR<sup>L858R/T790M</sup>–osimertinib–BJJ-04-125-02 systems (purple). Major functional regions with significant differences among systems were highlighted by green (P loop), yellow (β3-αC loop), red (αC helix), orange (αC-β4 loop), and purple (A loop) background, respectively. (B) RMSD difference between the EGFR<sup>L858R/T790M</sup> and the EGFR<sup>L858R/T790M</sup>–osimertinib system (RMSF difference = RMSF<sub>apo</sub>–RMSF<sub>holo</sub>) was projected onto the structure of EGFR, in which the pink and

blue region reflected the more fluctuations within the EGFR<sup>L858R/T790M</sup> and the EGFR<sup>L858R/T790M</sup>–osimertinib system, respectively.

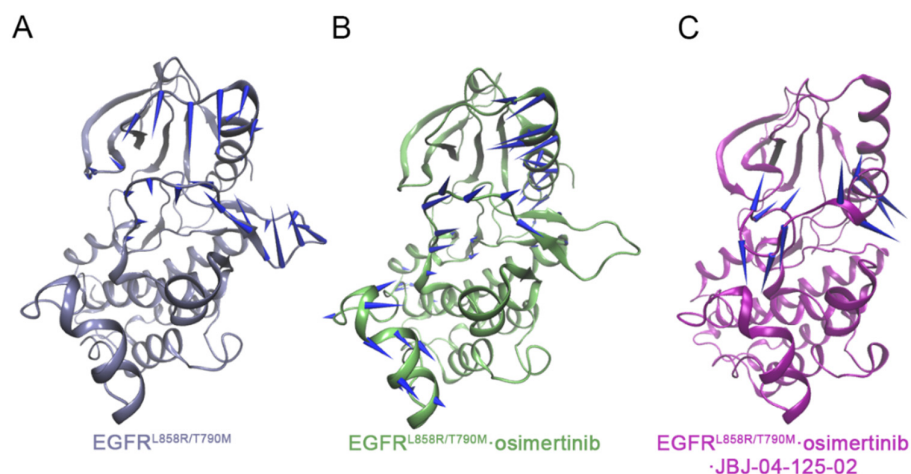

**Figure S4.** PCA analysis of (A) EGFR<sup>L858R/T790M</sup> system, (B) EGFR<sup>L858R/T790M</sup>–osimertinib system, and (C) EGFR<sup>L858R/T790M</sup>–osimertinib–JBJ-04-125-02 system. The porcupine plots were drawn with VMD to visualize the major movements along with PC1 obtained from PCA, with blue arrows depicted the directions of protein motions, whereas the length of the arrows represented the magnitude of the movements.

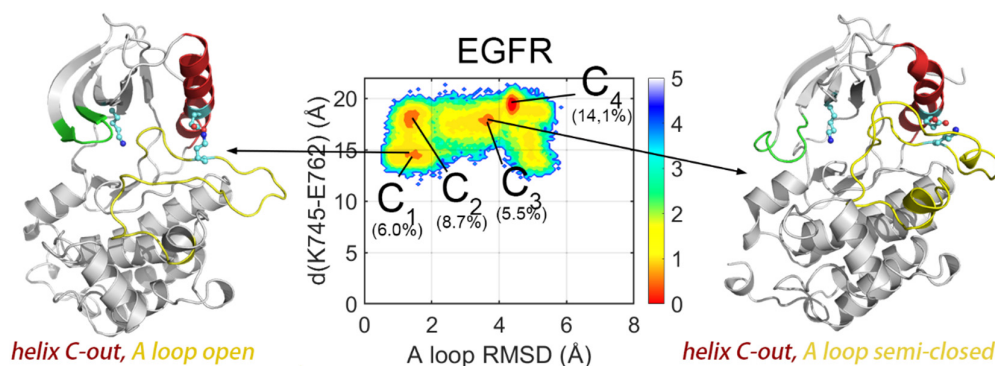

**Figure S5.** The representative structures of the secondary free energy minima are shown with the  $\alpha$ C helix colored in red, the K745–E762 residue pair in blue, the A loop in yellow, and the P loop in green. The unit of free-energy values is kcal/mol.

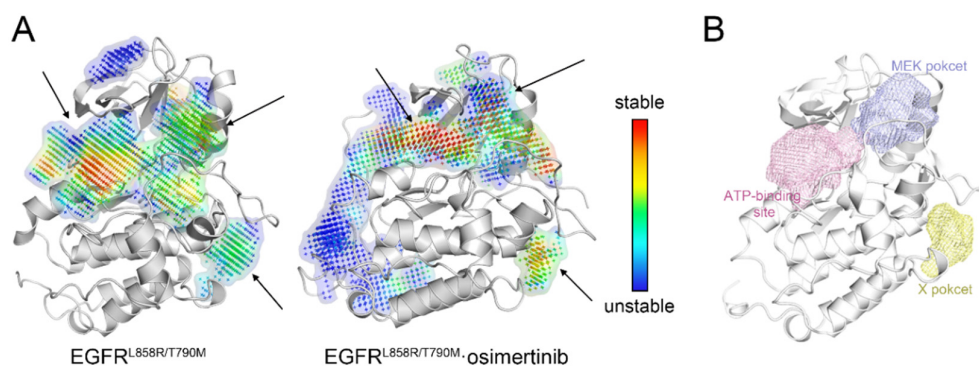

**Figure S6.** (A) Stability of pockets in the EGFR<sup>L858R/T790M</sup> (left) and the EGFR<sup>L858R/T790M</sup>–osimertinib (right) systems. (B) Overview of the ATP-binding site (pink), the MEK-pocket (blue), and the X-pocket (yellow).

## EGFR\_HUMAN

700 710

EGFR\_HUMAN .....PLTPSGEAPN.....QALLRILKETEKKKI  
 ABL1\_HUMAN ....YPAPKRNKPTVYGVSP.....NYDKWEMERTDITMK  
 ABL2\_HUMAN ....YPAPKCNKPTVYGVSP.....IHDKWEMERTDITMK  
 BRAF\_HUMAN ALQKSPGPQRERKSSSSS.....EDRN.....RMKTLGRRDSSDDWEIPDQGITVG  
 BTK\_HUMAN ....YPVSQQNKKNAPSTAGL.....GYGSWEIDPKDLTFL  
 FLT3\_HUMAN .....VTGS.....SDNE.....YFYVDFREYEDLKWFEPPRENLEFG  
 PGFRA\_HUMAN .....SISP.....DGHE.....YIYVDFPMQLPYDSRWEFFPRDGLVLG  
 ERBB2\_HUMAN .....PLTPSGAMPN.....QAQMRILKETELRKV  
 RET\_HUMAN .....SYSSSGARRPSLDSMEN.....QVSVDFAKILEDPKWEFPRKNLVLG  
 GSK3B\_HUMAN .....QPS.....AFGSMKVS RDKDGSKV.....TTVVATPGQGPDRPQEVSYTDT  
 MET\_HUMAN ....YPLTDMSPILTSGLSDISSPLLQNTVHIDLALNPVLQAVQHVIGPSSLIHFHN

## EGFR\_HUMAN

720 730 TT 740 750 760 770 T

EGFR\_HUMAN KVLGSGAFGTVYKGLWIP.EGEKVKIPVAIKELREAT.SPKANKEILD EAYVMASVD.NP  
 ABL1\_HUMAN HKLGGGQYGEVYGVWKK.Y...SLTVAVKTLK..E.DTMEVEEFLKEAAYVMKEIK.HP  
 ABL2\_HUMAN HKLGGGQYGEVYGVWKK.Y...SLTVAVKTLK..E.DTMEVEEFLKEAAYVMKEIK.HP  
 BRAF\_HUMAN QRIIGSGSFGTIVYKCKWHG.....DVAVKMLNVTAPTQQQLQAFKNEVGVLKTR.HV  
 BTK\_HUMAN KELGTGQFGVVKYKWRG.....QYDVAIKMK..E.GSMSEDEFIEEAKVMNLS.HE  
 FLT3\_HUMAN KVLGSGAFGKVMNATAYGISKTGVSIQVAVKMLKEKA.DSSEREALMSLKMMTQLGSHHE  
 PGFRA\_HUMAN RVLGSGAFGKVEGTAYGLSRSQPVMKVAVKMLKPTA.RSSEKQALMSLKMIMTHLGPHL  
 ERBB2\_HUMAN KVLGSGAFGTVYKGIWIP.DGENVKIPVAIKVLRNT.SPKANKEILD EAYVMAGVG.SP  
 RET\_HUMAN KTLGEGEFVKVKAATAFHLKGRAGYTTVAVKMLKENA.SPSELRLDLSSEFNVLKQVN.HP  
 GSK3B\_HUMAN KVICNGSFGVYQA KLCD.SGELV...AIKKVLQ.....DKRFKNRELQIMRKLD.HC  
 MET\_HUMAN EVIGRGHFGCVYHCTLLD.N.DGKKIHCAVKS LN RIT.DIGEVSQFLTEGIMKDES.HP

## EGFR\_HUMAN

T 780 790 TT 800

EGFR\_HUMAN HVCRLLGICLTST..VQLITQLMPFGCLLDYVREHKDN.....  
 ABL1\_HUMAN NLVQLLGVCITREP.PFYITTEFMTYGNLLDYLRRECNRQE.....  
 ABL2\_HUMAN NLVQLLGVCITREP.PFYITTEFMTYGNLLDYLRRECNRQE.....  
 BRAF\_HUMAN NILLFMGYSTKPO..LAIVTQWCEGSSLYHHLHIIETK.....  
 BTK\_HUMAN KLVQLYGVCITKOR.PIFIITEYMANCCLLNLYLREMRHR.....  
 FLT3\_HUMAN NIVNLLGACITLST..VQLITQLMPFGCLLDYVREHKDN.....  
 PGFRA\_HUMAN NIVNLLGACITKSG.PIYITTEYCFYGLVNYLHKNRDSFLSHHPEKPKKELDIFGLNPAD  
 ERBB2\_HUMAN YVSRLLGICLTST..VQLITQLMPFGCLLDYVREHKDN.....  
 RET\_HUMAN HVIKLYGACITLST..VQLITQLMPFGCLLDYVREHKDN.....  
 GSK3B\_HUMAN NIVRLRYFFYSSGEKK...DEVYLNLLVDYVRETIVYRVARH.....  
 MET\_HUMAN NVLSLLGICLRSEGSPLVVLPMYKHGLRNFIENETHN.....

## EGFR\_HUMAN

EGFR\_HUMAN .....  
 ABL1\_HUMAN .....  
 ABL2\_HUMAN .....  
 BRAF\_HUMAN .....  
 BTK\_HUMAN .....  
 FLT3\_HUMAN QSHP.....NS...SMPGSRVQIHPD.....SDQISGLHGN.....SFHSEDEI  
 PGFRA\_HUMAN ESTRSYVILSFENNGDYMDMKQADTTQYVPMLEKRVSKYSIDIQRSLYDRPASYYKKKSML  
 ERBB2\_HUMAN .....  
 RET\_HUMAN .....GYLGSGGSR.....  
 GSK3B\_HUMAN .....YSR.....  
 MET\_HUMAN .....



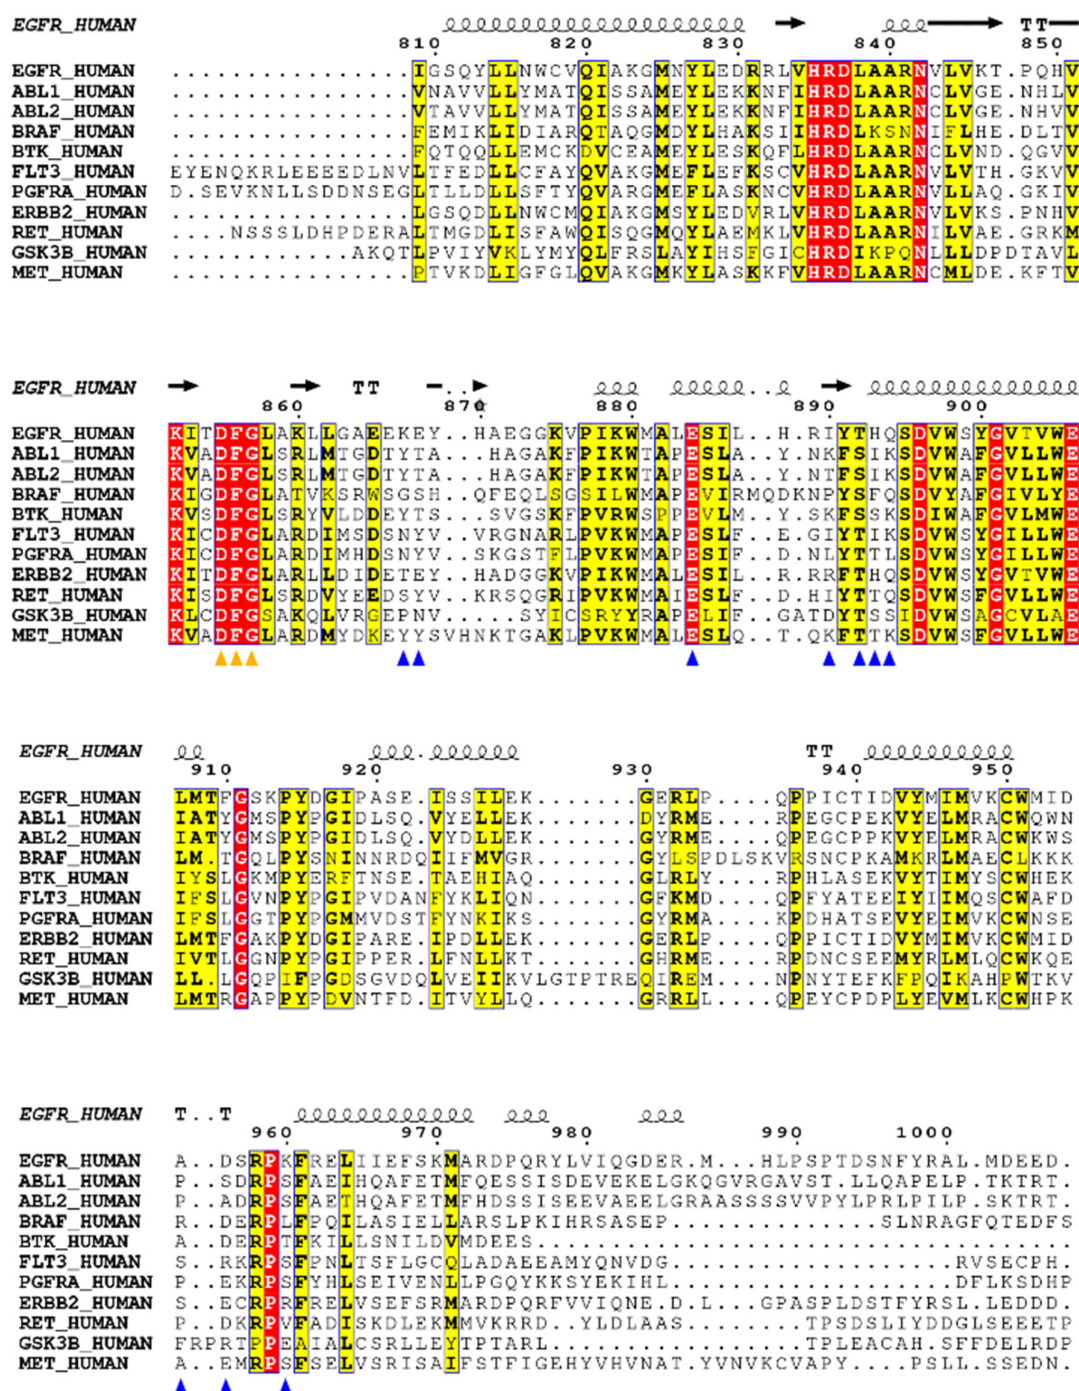

**Figure S7.** Sequence alignment of EGFR, ABL1, ABL2, BRAF, BTK, FLT3, PGFR, ERBB2, RET, GSK3, and MET. The residues forming the X-pocket and the MEK-pocket are pointed to by the blue and orange triangles, respectively.

**Table S1.** Residue-residue interactions in the X pocket with medium or large energy differences<sup>a</sup>

|    | Residue 1 | Residue 2 | E <sub>apo</sub> | E <sub>holo</sub> | ΔE      | Std. Dev. apo | Std. Dev. holo |
|----|-----------|-----------|------------------|-------------------|---------|---------------|----------------|
| 1  | MET 825   | HIE 835   | -0.9573          | -2.1845           | 1.2272  | 0.1974        | 1.2101         |
| 2  | MET 825   | HIE 893   | -0.5338          | -0.1669           | -0.3669 | 0.3439        | 0.0738         |
| 3  | MET 825   | PHE 961   | -3.7551          | -3.5754           | -0.1798 | 0.3245        | 0.3877         |
| 4  | ASN 826   | PHE 961   | -1.8497          | -2.1759           | 0.3262  | 0.6133        | 0.4914         |
| 5  | GLU 829   | LEU 833   | -0.3273          | -0.6605           | 0.3332  | 0.2490        | 0.3123         |
| 6  | GLU 829   | HIE 893   | -2.9778          | -2.6696           | -0.3082 | 1.0807        | 0.6015         |
| 7  | GLU 829   | LYS 960   | -2.6584          | -1.9097           | -0.7488 | 4.0318        | 3.2972         |
| 8  | GLU 829   | PHE 961   | -1.1195          | -1.5502           | 0.4307  | 0.4419        | 0.4398         |
| 9  | GLU 829   | ARG 962   | -3.0614          | -2.3352           | -0.7261 | 4.1218        | 3.3502         |
| 10 | ARG 832   | LEU 862   | -4.0452          | -4.6113           | 0.5661  | 1.3760        | 1.1919         |
| 11 | ARG 832   | GLU 865   | -0.2294          | -0.4793           | 0.2499  | 1.0484        | 0.8529         |
| 12 | ARG 832   | GLU 866   | -0.7301          | -3.4147           | 2.6846  | 1.6229        | 2.5436         |
| 13 | ARG 832   | LYS 867   | -0.1032          | -0.4682           | 0.3650  | 0.3057        | 0.3993         |
| 14 | ARG 832   | HIE 893   | -0.4036          | -1.7168           | 1.3132  | 0.5123        | 1.1650         |
| 15 | LEU 833   | HIE 893   | -1.8071          | -1.4675           | -0.3396 | 1.0861        | 0.5166         |
| 16 | LEU 833   | ASP 896   | -0.6648          | -0.8733           | 0.2085  | 0.1896        | 0.2987         |
| 17 | VAL 834   | TYR 869   | -0.3210          | -0.9654           | 0.6444  | 0.3981        | 0.3205         |
| 18 | VAL 834   | HIE 893   | -2.5650          | -1.9398           | -0.6252 | 1.0015        | 0.5078         |
| 19 | VAL 834   | ASP 896   | -6.1670          | -6.7851           | 0.6181  | 0.8414        | 0.8956         |
| 20 | HIE 835   | ASP 896   | -5.9740          | -10.6266          | 4.6526  | 0.9086        | 2.8292         |
| 21 | HIE 835   | PHE 961   | -0.0630          | -0.2372           | 0.1742  | 0.0189        | 0.1512         |
| 22 | LEU 862   | GLU 866   | -0.7682          | -2.3728           | 1.6046  | 1.1177        | 1.2625         |
| 23 | LEU 862   | LYS 867   | -0.4125          | -1.0923           | 0.6798  | 0.6072        | 0.3620         |
| 24 | LEU 862   | GLU 868   | -0.3067          | -1.2420           | 0.9353  | 0.5729        | 0.3049         |
| 25 | LEU 862   | TYR 869   | -0.5817          | -1.2485           | 0.6668  | 0.7714        | 0.2939         |
| 26 | LEU 862   | TYR 891   | -0.4189          | -0.2239           | -0.1949 | 0.3244        | 0.1010         |
| 27 | LEU 862   | THR 892   | -0.6610          | -0.1977           | -0.4633 | 0.4007        | 0.1917         |
| 28 | LEU 862   | HIE 893   | -1.3190          | -1.1309           | -0.1881 | 0.5465        | 0.2809         |
| 29 | GLU 865   | TYR 869   | -0.7906          | -0.0171           | -0.7735 | 1.1794        | 0.0057         |
| 30 | GLU 865   | HIE 870   | -0.2972          | -0.0069           | -0.2903 | 0.7620        | 0.0053         |
| 31 | GLU 865   | ARG 889   | -0.4343          | -0.0096           | -0.4247 | 1.1136        | 0.0035         |
| 32 | GLU 865   | ILE 890   | -0.1755          | -0.0014           | -0.1742 | 0.4293        | 0.0018         |
| 33 | GLU 865   | TYR 891   | -0.1969          | 0.0011            | -0.1980 | 0.4206        | 0.0016         |
| 34 | GLU 866   | HIE 870   | -0.4586          | -0.0914           | -0.3672 | 0.8205        | 0.2175         |
| 35 | LYS 867   | ARG 889   | -0.2752          | 0.0364            | -0.3116 | 0.9071        | 0.0169         |
| 36 | LYS 867   | ILE 890   | -0.1587          | 0.0832            | -0.2419 | 0.4919        | 0.0580         |
| 37 | LYS 867   | THR 892   | -0.4240          | -1.1678           | 0.7439  | 0.8157        | 0.9184         |
| 38 | LYS 867   | HIE 893   | -0.0737          | -0.2560           | 0.1823  | 0.1882        | 0.3512         |
| 39 | GLU 868   | ILE 890   | -0.3350          | -0.9615           | 0.6265  | 0.5573        | 0.3879         |
| 40 | GLU 868   | TYR 891   | -0.4867          | -2.2697           | 1.7830  | 0.9542        | 0.5422         |
| 41 | GLU 868   | THR 892   | -0.3030          | -1.1068           | 0.8038  | 0.5638        | 0.3764         |
| 42 | TYR 869   | ILE 890   | -0.8223          | -2.4212           | 1.5989  | 1.1506        | 0.4861         |
| 43 | TYR 869   | TYR 891   | -1.9199          | -4.7069           | 2.7870  | 2.1241        | 0.6538         |
| 44 | TYR 869   | THR 892   | -0.1734          | -0.3463           | 0.1729  | 0.2195        | 0.0930         |
| 45 | HIE 870   | HIE 888   | -0.3422          | -0.8043           | 0.4622  | 0.4161        | 0.8402         |
| 46 | HIE 870   | ILE 890   | -0.5222          | -1.7968           | 1.2746  | 0.7529        | 0.6236         |
| 47 | HIE 870   | TYR 891   | -0.4761          | -0.7498           | 0.2737  | 0.5647        | 0.2920         |
| 48 | LEU 883   | TRP 898   | -2.4874          | -2.0479           | -0.4395 | 0.5295        | 0.6873         |
| 49 | GLU 884   | ARG 889   | -1.2523          | -0.9885           | -0.2639 | 0.5441        | 0.4838         |
| 50 | GLU 884   | ILE 890   | -4.5502          | -4.1662           | -0.3840 | 0.6977        | 0.9122         |
| 51 | GLU 884   | SER 895   | -4.4255          | -4.1586           | -0.2669 | 1.9253        | 1.5507         |
| 52 | GLU 884   | ALA 955   | -0.8663          | -0.6053           | -0.2611 | 0.3539        | 0.3319         |
| 53 | SER 885   | ARG 889   | -2.5563          | -1.5640           | -0.9923 | 1.7614        | 1.0036         |
| 54 | TYR 891   | SER 895   | -1.4311          | -1.6822           | 0.2511  | 0.5298        | 0.4940         |
| 55 | HIE 893   | VAL 897   | -1.7232          | -1.5168           | -0.2064 | 0.6041        | 0.5919         |
| 56 | GLN 894   | ASP 956   | -1.7398          | -1.3318           | -0.4080 | 1.3943        | 0.8669         |
| 57 | GLN 894   | ARG 958   | -4.8253          | -4.6602           | -0.1651 | 1.1817        | 1.2857         |

---

|    |         |         |         |         |         |        |        |
|----|---------|---------|---------|---------|---------|--------|--------|
| 58 | SER 895 | ARG 958 | -0.7921 | -0.9663 | 0.1742  | 0.5329 | 0.5387 |
| 59 | VAL 897 | PHE 961 | -2.5021 | -2.3061 | -0.1960 | 0.3485 | 0.3440 |
| 60 | MET 952 | ARG 958 | -8.2599 | -7.8620 | -0.3978 | 1.0434 | 1.0804 |
| 61 | ILE 953 | ARG 958 | -2.3903 | -2.6922 | 0.3019  | 1.0210 | 1.0897 |
| 62 | ASP 956 | LYS 960 | -0.9931 | -0.7678 | -0.2253 | 2.0096 | 1.5434 |

---

a. Residue-residue interactions with large energy differences are highlighted in green background.
